# Supplementary material
Source: publisher figshare collection journal article supplement (https://gsapubs.figshare.com/articles/dataset/_/21538446)
Supplement: Supplementary file 1 [file 1]

## Sheet: Title
	Magmatic-hydrothermal evolution of long-lived Nb-Ta-(Sn) mineralization in Lianyunshan, NE Hunan, South China
	Nuerkanati Madayipua, Huan Lia,⁎, Safiyanu Muhammad Elatikpoa, Michael W. Forsterb, Hou-Xiang Zhouc, Qian-Hong Wua, Han Zhenga
	a. Key Laboratory of Metallogenic Prediction of Nonferrous Metals and Geological Environment Monitoring, Ministry of Education, School of Geosciences and Info–Physics, Central South University, Changsha 410083, China
	b. School of Natural Sciences, Macquarie University, NSW 2109, Sydney, Australia
	c. Hunan Provincial Institute of Land and Resources Planning, Changsha 410007, China
	Corresponding author Email: lihuan@csu.edu.cn (H. Li)

## Sheet: Table S1
	Table S1 Sampling locations and petrological features of pegmatites, muscovite monzogranite, schist from the Lianyunshan complex in the northeast Hunan, South China
	Sample No.	Ore-free pegmatite (25-16S1)	Ore-bearing pegmatite (23-27S2)	Muscovite monzogranite (23-29S1)	Schist (23-30S4)
	Sampling location	Lianyunshan complex	Lianyunshan complex	Lianyunshan complex	Lianyunshan complex
	coordinate location	113°34′03.48″E, 28°21′04.37″N	113°49′33.28″E, 28°33′42.50″N	113°49′33.28″E, 28°33′42.50″N	113°49′33.28″E, 28°33′42.50″N
	Texture	Giant-grained texture	Giant-grained texture	Granitic texture	Lepido granoblastic texture
	Structure	Massive structure	Massive structure	Massive structure	Blastobedding structure
	Mineral composition	Albite (~45 vol.%), quartz (~35 vol.%), garnet (~12 vol.%), muscovite (~5 vol.%), accessory minerals (~3 vol.%)	Albite (~45 vol.%), quartz (~30 vol.%), garnet (~12 vol.%), muscovite (~10 vol.%), accessory minerals (~3 vol.%)	Quartz (~35 vol.%), K–feldspar (~25 vol.%), plagioclase (~25 vol.%), and muscovite (~ 10 vol.%), accessory minerals (~5 vol.%)	Plagioclase (~45 vol.%), quartz (~30 vol.%), biotite and a small amount of muscovite (~22 vol.%), accessory minerals (~3 vol.%)
	Rock type	Muscovite-albite pegmatite	Graphic pegmatite	Garnite-bearing muscovite monzogranite	Biotite schist
	Aaccessory minerals	Zircon, garnet, monazite, and apatite	Zircon, garnet, cassiterite, tourmaline, and columbite-tantalite (coltan)	Zircon, garnet, monazite, ilmenite, magnetite, tourmaline, and apatite	Zircon, garnet, magnetite, tourmaline, and apatite

## Sheet: Table S2
	Table S2 Major element (wt.%) compositions of the coltan grains from the ore-bearing pegmatite (23-27S2, n = 34) in the Lianyunshan Complex of northeast Hunan, South China
	Spots	Coltan structure pattern		Nb2O5	Ta2O5	FeO	MnO	WO3	TiO2	SnO2	Sc2O3	ZrO2	UO2	Total	Normalized cations
		Structure types	Types												Nb	Ta	Fe	Mn	W	Ti	Sn	Sc	Zr	U	Ta/(Nb+Ta)	Mn/(Fe+Mn)
	23-27S2-1-1	HG	Fcl	66.328	12.307	15.906	3.308	0.76	0.811	0.08	0.028	0.109	0.01	99.647	1.47776	0.164939	0.262216	0.0552176	0.0116485	0.0240543	0.00125749	0.000721402	0.00209556	8.7729e-05	0.100407	0.17395
	23-27S2-1-2		Fcl	68.152	11.948	16.134	3.193	0.577	0.811	0.076	0	0	0	100.891	1.49457	0.157614	0.2618	0.0524614	0.00870489	0.0236767	0.00117586	0	0	0	0.0953977	0.166935
	23-27S2-2-1	RS	Fcl	32.512	46.653	13.93	2.024	2.444	1.465	0.4	0.099	0	0.104	99.631	0.850337	0.733991	0.269581	0.0396609	0.0439743	0.0510093	0.00738096	0.00299429	0	0.00107107	0.463282	0.128252
	23-27S2-2-2		Fcl	33.852	45.321	14.289	1.797	1.918	1.56	0.281	0.058	0.006	0.019	99.101	0.882623	0.710811	0.275666	0.0351029	0.0344025	0.0541476	0.00516895	0.00174876	0.000134992	0.000195065	0.446087	0.112955
	23-27S2-3-1	RS	Ftn	22.353	55.793	11.352	4.679	3.561	0.961	0.305	0.052	0.07	0.106	99.232	0.621552	0.933221	0.233563	0.0974762	0.0681183	0.0355737	0.00598338	0.00167208	0.0016796	0.0011606	0.60023	0.294455
	23-27S2-3-2		Fcl	53.153	27.947	14.564	2.854	1.166	0.501	0.117	0.018	0.11	0.08	100.51	1.2569	0.397533	0.254827	0.0505629	0.0189681	0.0157716	0.00195194	0.000492219	0.00224457	0.000744903	0.240283	0.165568
	23-27S2-4-1	RS	Fcl	65.662	11.98	15.865	4.655	0.716	0.811	0.015	0.022	0.03	0.015	99.771	1.46346	0.160616	0.261637	0.0777305	0.0109782	0.0240632	0.000235866	0.000567025	0.000576973	0.000131642	0.0988965	0.229045
	23-27S2-4-2		Fcl	35.211	43.128	14.782	2.118	2.624	1.252	0.17	0.032	0.134	0.05	99.501	0.909342	0.669996	0.28247	0.0409807	0.046619	0.0430445	0.00309744	0.000955676	0.00298621	0.000508457	0.424226	0.126698
	23-27S2-5-1	RS	Fcl	54.03	24.132	15.052	4.533	1.248	0.443	0.04	0.032	0.026	0.055	99.591	1.27674	0.343023	0.263179	0.0802521	0.0202877	0.0139359	0.000666857	0.000874437	0.00053016	0.000511759	0.211774	0.233677
	23-27S2-5-2		Fcl	66.005	11.091	15.74	4.679	0.698	0.655	0	0.009	0.01	0.059	98.946	1.47955	0.14955	0.261065	0.0785795	0.0107636	0.019546	0	0.000233296	0.000193428	0.000520763	0.0917993	0.231358
	23-27S2-5-3		Fcl	39.212	40.267	14.967	1.93	1.884	1.127	0.175	0.063	0.028	0.035	99.688	0.992893	0.613333	0.28042	0.0366138	0.0328182	0.0379902	0.00312627	0.00184474	0.000611798	0.000348969	0.381847	0.115489
	23-27S2-6-1	RS	Fcl	67.726	11.359	15.661	2.992	1.162	1.419	0.118	0	0.005	0.118	100.56	1.48504	0.149826	0.254093	0.0491528	0.0175283	0.0414218	0.00182545	0	9.46061e-05	0.00101883	0.0916441	0.162089
	23-27S2-6-2		Fcl	33.767	45.964	14.233	1.871	2.127	1.336	0.353	0.117	0.141	0.019	99.928	0.875875	0.717185	0.273172	0.0363603	0.0379549	0.0461339	0.00645996	0.00350951	0.00315599	0.000194061	0.450193	0.117468
	23-27S2-7-1	HG	Fcl	66.49	11.552	15.529	4.58	0.824	0.897	0.103	0	0.069	0.121	100.165	1.47262	0.153906	0.254489	0.0759983	0.0125549	0.0264479	0.00160945	0	0.00131871	0.00105525	0.0946225	0.229958
	23-27S2-7-2		Fcl	67.281	11.494	15.334	3.083	0.963	0.863	0.135	0.003	0.025	0	99.181	1.49875	0.154018	0.252746	0.0514535	0.0147576	0.0255925	0.00212167	7.72806e-05	0.000480556	0	0.0931879	0.169144
	23-27S2-8-1	RS	Ftn	28.263	51.361	14.187	2.059	2.311	1.597	0.315	0.078	0.16	0.063	100.394	0.749783	0.819624	0.278483	0.040924	0.0421762	0.0564009	0.00589567	0.00239289	0.00366272	0.000658102	0.522251	0.128125
	23-27S2-8-2		Ftn	29.807	49.688	13.782	2.121	1.988	1.466	0.264	0.006	0.023	0.102	99.247	0.794265	0.796457	0.271738	0.042344	0.036443	0.052005	0.00496314	0.000184889	0.000528861	0.00107024	0.500689	0.134818
	23-27S2-9-1	RS	Fcl	55.476	24.246	14.517	3.132	1.327	0.457	0.094	0	0	0.039	99.288	1.30914	0.344179	0.253482	0.055374	0.0215428	0.0143569	0.001565	0	0	0.000362394	0.208175	0.179287
	23-27S2-9-2		Fcl	54.532	25.235	14.015	2.871	1.719	0.433	0.1	0.03	0.088	0.024	99.047	1.29556	0.360641	0.246372	0.0511028	0.0280953	0.0136949	0.00167615	0.000824215	0.00180408	0.00022452	0.217751	0.171789
	23-27S2-9-3		Ftn	20.777	58.439	10.635	4.955	2.952	1.149	0.218	0.058	0.134	0	99.317	0.581917	0.984566	0.220398	0.103974	0.0568781	0.0428413	0.00430765	0.00187853	0.00323854	0	0.62852	0.32054
	23-27S2-10-1	RS	Fcl	36.279	42.589	14.295	1.981	2.366	1.221	0.125	0.022	0.083	0.044	99.005	0.937258	0.661859	0.273262	0.0383436	0.0420503	0.0419937	0.00227835	0.000657262	0.00185033	0.000447602	0.41389	0.123052
	23-27S2-10-2		Fcl	32.389	46.451	14.041	1.697	2.637	1.517	0.345	0.077	0.067	0.084	99.305	0.849561	0.732918	0.272512	0.033349	0.0475836	0.052972	0.00638442	0.0023356	0.00151649	0.000867585	0.463146	0.109033
	23-27S2-11-1	HG	Fcl	63.159	16.288	15.515	2.868	1.373	0.753	0.099	0	0.055	0.171	100.281	1.42383	0.220878	0.2588	0.0484401	0.0212933	0.0225986	0.00157457	0	0.00106992	0.00151794	0.134297	0.157662
	23-27S2-11-2		Fcl	61.678	16.285	15.884	2.905	1.13	0.696	0.134	0.044	0.071	0.269	99.096	1.41107	0.224115	0.268887	0.0497931	0.0177847	0.0211979	0.00216286	0.00116408	0.00140166	0.0024233	0.137058	0.156248
	23-27S2-12-1	HG	Fcl	64.653	15.277	15.999	3.034	0.933	0.556	0.074	0.022	0.085	0.02	100.653	1.44484	0.205368	0.264555	0.0507986	0.0143438	0.0165413	0.00116673	0.000568547	0.00163914	0.000175994	0.12445	0.161085
	23-27S2-12-2		Fcl	64.239	15.935	15.477	2.777	1.02	0.515	0.078	0.009	0.04	0.037	100.127	1.44587	0.215747	0.257755	0.0468284	0.0157936	0.0154312	0.0012386	0.000234252	0.000776884	0.000327919	0.129842	0.153746
	23-27S2-13-1	RS	Fcl	62.195	18.177	14.845	2.884	0.946	0.716	0.082	0.014	0	0.024	99.883	1.41414	0.248612	0.249751	0.0491288	0.0147972	0.0216727	0.00131539	0.000368109	0	0.000214874	0.149519	0.164376
	23-27S2-13-2		Fcl	65.65	13.889	15.288	3.065	0.751	0.572	0.139	0	0	0.04	99.394	1.4752	0.187737	0.254189	0.0516	0.0116093	0.017111	0.00220361	0	0	0.000353925	0.112895	0.168744
	23-27S2-13-3		Fcl	66.544	12.815	15.491	3.123	0.964	0.675	0.019	0.042	0.059	0.082	99.814	1.48268	0.17176	0.255393	0.0521333	0.0147763	0.020022	0.000298674	0.00108218	0.00113438	0.00071943	0.103817	0.169525
	23-27S2-14-1	HG	Fcl	63.703	13.3	15.874	4.593	0.846	0.721	0.095	0	0.025	0	99.157	1.43928	0.180759	0.265377	0.0777474	0.0131494	0.0216863	0.00151431	0	0.000487407	0	0.111577	0.226587
	23-27S2-14-2		Fcl	65.467	12.781	16.09	3.189	0.853	0.699	0.027	0.015	0.064	0	99.185	1.47019	0.172656	0.267362	0.0536551	0.0131781	0.0208975	0.000427781	0.000389543	0.00124022	0	0.105095	0.167141
	23-27S2-15-1	RS	Fcl	61.159	17.762	15.702	3.037	1.149	0.485	0	0.087	0	0.044	99.425	1.40126	0.244802	0.266198	0.0521324	0.0181105	0.0147933	0	0.0023051	0	0.00039696	0.148719	0.163768
	23-27S2-15-2		Fcl	56.745	23.178	15.432	2.726	1.4	0.569	0.061	0.025	0	0.005	100.141	1.32053	0.324459	0.265725	0.047528	0.0224129	0.0176277	0.00100151	0.000672777	0	4.58169e-05	0.197241	0.151724
	23-27S2-15-3		Ftn	25.554	52.903	12.726	4.545	2.868	0.943	0.247	0.076	0.023	0	99.885	0.693374	0.863481	0.2555	0.0923946	0.0535351	0.0340631	0.00472837	0.0023847	0.000538522	0	0.554632	0.265582
	Note: Fcl = Ferrocolumbite; Ftn = Ferrotantalite; HG = homogeneous grain; DS = disequilibrium crystallization structures including oscillatory zoning and primary growth rim; RS = replacement structures including alteration rim, patchy, irregular and complex zoning patterns. HG+DS =29 % of the total, and RS = 71 % of the total

## Sheet: Table S3
	Table S3 Coltan U-Pb dating by LA-ICP-MS of the ore-bearing pegmatite (23-27S2) in the Lianyunshan Complex of northeast Hunan, South China
	Spots	Mineralization type	207Pb/206Pb		207Pb/235U	207Pb/235U	206Pb/238U	206Pb/238U	207Pb/206Pb		207Pb/235U	207Pb/235U	206Pb/238U	206Pb/238U
			Ratio	1sigma	Ratio	1sigma	Ratio	1sigma	Age (Ma)	1sigma	Age (Ma)	1sigma	Age (Ma)	1sigma
	23-27S2-3	MS	0.0591664	0.00264976	0.170702	0.00784565	0.0211782	0.000329633	572.255	130.537	160.028	6.80562	135.098	2.08216
	23-27S2-5	HS	0.0545101	0.00392825	0.139547	0.00950676	0.0193686	0.000408906	390.79	162.945	132.641	8.47139	123.664	2.58676
	23-27S2-6	MS	0.0520499	0.00203407	0.155855	0.00677906	0.0220506	0.000544337	287.1	90.7275	147.069	5.95603	140.603	3.43415
	23-27S2-7	MS	0.0679802	0.00349471	0.195573	0.0111892	0.0207721	0.000410937	877.775	102.778	181.373	9.50366	132.534	2.59615
	23-27S2-8	HS	0.0534551	0.00294861	0.13964	0.0076743	0.0192239	0.000396711	346.35	130.54	132.723	6.83815	122.749	2.51
	23-27S2-9	MS	0.0533934	0.00373114	0.147489	0.0104715	0.0208351	0.000528151	346.35	154.61	139.693	9.26647	132.931	3.33596
	23-27S2-10	MS	0.0523355	0.0014789	0.155203	0.00513471	0.0215438	0.000413014	301.91	64.81	146.495	4.51433	137.405	2.60737
	23-27S2-11	MS	0.0506602	0.00148594	0.147878	0.00460223	0.0212695	0.000316331	233.4	66.655	140.036	4.07212	135.674	1.99807
	23-27S2-14	HS	0.0506012	0.00314109	0.125918	0.00724326	0.0186725	0.000369162	233.4	144.425	120.423	6.53268	119.261	2.33704
	23-27S2-15	MS	0.053549	0.00246669	0.149025	0.00767436	0.0205158	0.000475809	353.76	99.065	141.051	6.78244	130.915	3.00643
	23-27S2-17	MS	0.0500759	0.00244498	0.146552	0.00742999	0.0215842	0.000464587	198.23	114.8	138.863	6.58065	137.66	2.93259
	23-27S2-18	MS	0.050521	0.0013198	0.143856	0.00401764	0.0210767	0.00041984	220.44	56.47	136.473	3.5676	134.457	2.65159
	23-27S2-19	MS	0.0526298	0.00153116	0.158888	0.00490456	0.0223601	0.000418446	322.28	60.18	149.729	4.29843	142.555	2.6396
	23-27S2-20	HS	0.0519543	0.00239379	0.13393	0.00622625	0.0191601	0.000331246	283.395	105.54	127.623	5.576	122.346	2.09625
	23-27S2-21	HS	0.0547355	0.00282218	0.141415	0.00750218	0.0187936	0.000375136	466.71	119.433	134.303	6.67444	120.027	2.37456
	23-27S2-22	MS	0.0474862	0.00150928	0.142866	0.00460705	0.0221669	0.000339065	72.315	74.065	135.594	4.09419	141.336	2.13972
	23-27S2-24	MS	0.0485856	0.00178782	0.136504	0.00523007	0.0207684	0.00035494	127.865	87.025	129.925	4.67352	132.51	2.24268
	23-27S2-25	HS	0.0472546	0.00110858	0.121646	0.00292837	0.0188304	0.000220461	61.205	-141.648	116.563	2.65213	120.26	1.39643
	23-27S2-26	MS	0.0513198	0.00273364	0.142262	0.00773654	0.0206412	0.00038896	253.77	122.205	135.056	6.87781	131.707	2.45772
	23-27S2-27	HS	0.0547488	0.00265848	0.137021	0.00619061	0.0186746	0.000308642	466.71	102.768	130.387	5.52905	119.274	1.95422
	23-27S2-29	MS	0.0637494	0.00158027	0.188095	0.00547563	0.0215003	0.000368815	733.03	52.62	175.003	4.68115	137.131	2.32867
	23-27S2-30	HS	0.0475819	0.000762773	0.126546	0.00239252	0.0194154	0.000281922	79.72	38.885	120.989	2.158	123.96	1.78403
	23-27S2-32	HS	0.053021	0.00220182	0.132427	0.0057129	0.0183862	0.000308778	331.54	94.435	126.276	5.12315	117.449	1.9556
	23-27S2-33	HS	0.0569454	0.00332028	0.141298	0.00818838	0.018414	0.000389547	500.04	129.61	134.199	7.28556	117.625	2.4666
	23-27S2-34	HS	0.0544474	0.00413172	0.130892	0.00915198	0.0185405	0.000424817	390.79	170.352	124.899	8.21764	118.425	2.68946
	23-27S2-35	HS	0.0466904	0.00284078	0.116614	0.00646375	0.01891	0.000383409	31.58	140.725	111.998	5.87824	120.763	2.42662
	23-27S2-36	HS	0.049732	0.00248711	0.124452	0.00610879	0.0187297	0.000396976	188.97	116.65	119.1	5.51685	119.623	2.51285
	Note: MS = magmatic stage mineralization age; HS = hydrothermal stage mineralization age

## Sheet: Table S4
	Table S4 LA-ICP-MS trace element (ppm) compositions of the coltan grains from the Lianyunshan complex in the northeast Hunan, South China
	Spots	Mineralization type	Pb (total)	Th	U	Th/U	Hf	W	Sc	Ti	Mn	Fe	Sn	La	Ce	Pr	Nd	Sm	Eu	Gd	Tb	Dy	Ho	Er	Tm	Yb	Lu	Y	ΣREE	Eu/Eu*	Ce/Ce*
	23-27S2-3	MS	4.30074	2.11682	167.089	0.0126688	261.266	1983.11	136.975	2900.71	30789.5	89704.7	706.949	0.00391049	0	0.0166541	0.0226384	0.038485	0.0176472	0	0.0146169	0.120161	0.00260312	0.0428261	0	0.0759224	0	0.104449	0.355464	1.03309	1
	23-27S2-5	HS	3.14157	1.19609	135.199	0.00884687	78.181	3493	111.058	2879.76	35461.6	114911	362.411	0.0090048	0.0183006	0.0210734	0	0.0219054	0.039705	0.125317	0.0215481	0.0406453	0	0.0107094	0.00468343	0.0687961	0.0090311	0.0191279	0.39072	2.3168	0.32572
	23-27S2-6	MS	9.46147	7.12809	372.923	0.0191141	520.365	2657.53	174.988	4573.82	28358.4	68860.8	1559.63	0.017741	0	0	0.0440291	0.240486	0	0.221038	0.0208671	0.0647301	0	0	0	0.0839429	0	0.275001	0.692834	1
	23-27S2-7	MS	5.49257	1.64743	218.554	0.00753787	166.254	2832.74	108.011	3610.27	29119.2	93516.8	814.806	0.0241192	0.0742726	0.0187033	0	0.10161	0.0163895	0.141667	0.0120096	0.010957	0.00902667	0	0	0.0943699	0	0.0669646	0.503125	0.417624	0.85738
	23-27S2-8	HS	3.39753	1.68817	148.336	0.0113807	101.759	3329.32	113.928	2881.66	31745.8	106702	455.21	0.000398326	0	0	0.140052	0.113555	0.000592138	0.192526	0	0	0	0	0.0125948	0.033195	0.0141702	0	0.507084	0.0122433
	23-27S2-9	MS	2.68676	1.41031	109.135	0.0129226	95.7943	2861.99	98.8039	2411.95	31060.9	102775	385.628	0.00083297	0.0136289	0.00368928	0.0447958	0	0	0	0	0.0800329	0.0196151	0.00708742	0.0200255	0.0337159	0.00490086	0.0448799	0.228325		1.90616
	23-27S2-10	MS	13.4932	8.2535	539.14	0.0153086	800.987	1975.27	197.384	5763.56	33122.6	67636.8	1772.06	0.0142383	0	0	0.0788178	0	0	0.346176	0	0.0655232	0.0116686	0	0	0.061958	0.0431001	0.490002	0.621482
	23-27S2-11	MS	10.0566	5.60352	400.095	0.0140055	234.161	1519.98	113.786	6381.83	19437.1	77868.6	1669.97	0.032969	0.0120323	0	0.0695152	0	0.0354217	0	0	0.0501188	0.0409291	0.0510665	0.03863	0.391679	0.0804589	0.543023	0.802821		0.226636
	23-27S2-14	HS	2.84472	1.36966	128.748	0.0106383	64.8066	2806.47	90.1741	3521.81	31009.3	99659.3	272.385	0.00444379	0	0	0.00451038	0	0.0409588	0.184232	0.0207176	0	0	0	0.0101991	0.0403565	0.0113522	0.0923908	0.31677
	23-27S2-15	MS	4.07786	2.31647	171.676	0.0134933	54.7055	3014.91	100.902	3094.86	33792.3	105902	289.346	0.00551908	0	0	0	0	0	0.0499384	0	0	0.0129323	0.0100566	0.0207981	0	0.0332726	0.0268327	0.132517
	23-27S2-17	MS	3.68933	1.1363	147.734	0.00769153	129.969	2337.77	94.9243	3223.83	29835.3	96109.3	555.356	0.0117559	0	0	0.0245468	0	0.00852387	0.124374	0	0.0288127	0	0	0	0.0325108	0	0.0446838	0.230524
	23-27S2-18	MS	12.2915	7.3601	511.462	0.0143903	776.988	2134.38	188.189	5794.5	32819.2	65632	1868.96	0.00431859	0.00469574	0.00832705	0.0453695	0.146857	0.0186971	0.0406254	0.00789148	0.0710272	0.0409862	0.140658	0	0.218847	0.0503591	0.537957	0.79866	0.740035	0.191987
	23-27S2-19	MS	9.68872	5.4285	379.83	0.0142919	218.169	1458.71	112.531	6101.85	18562.8	75601.9	1621.44	0	0.0214228	0	0.0868518	0.0454395	0.0142693	0.243859	0	0.120356	0.0324526	0.0378067	0.0248769	0.120964	0.0500342	0.619428	0.798333	0.41442
	23-27S2-20	HS	4.48469	2.14527	203.134	0.0105608	74.9154	3444.76	104.371	3963.25	33160.7	106649	366.652	0	0	0.0255417	0	0	0.0145624	0.309498	0.0120261	0	0.012253	0.0105017	0	0	0.0316111	0.0668821	0.415994
	23-27S2-21	HS	6.08582	2.0276	269.054	0.00753604	215.893	2469.58	141.581	4560.84	37446	116125	897.653	0	0.00821189	0.00730404	0	0.0763012	0.171809	0	0	0.0190264	0	0.0120113	0	0.0765125	0.00165195	0.106137	0.372828
	23-27S2-22	MS	10.1757	4.96796	393.516	0.0126245	171.487	1413.04	95.59	6134.88	17679.1	76453.4	1709.19	0.0218198	0.0294584	0.0330743	0	0	0.0392129	0.0567142	0.0191029	0.147639	0.0316304	0.151708	0.0422854	0.488352	0.111198	0.766439	1.1722		0.268859
	23-27S2-24	MS	6.56208	1.96406	269.936	0.007276	188.952	3121.6	113.084	3848.94	28522.5	91452.2	965.272	0	0	0.0952794	0.0672826	0.105511	0.0278169	0	0	0.0222379	0	0	0.00750799	0.0229643	0.00291497	0.0614479	0.351515
	23-27S2-25	HS	16.4332	8.10142	737.895	0.0109791	151.768	5941.27	134.987	6425.67	31391.8	103348	780.585	0.0134009	0.00299354	0	0.071617	0.154089	0.01052	0	0.01091	0.0105991	0	0	0.00909717	0.103107	0.0184821	0.207585	0.404816	0.376845	0.124296
	23-27S2-26	MS	3.63971	1.12002	149.649	0.0074843	126.929	2218.93	93.6403	3121.03	28460.8	92759.2	543.826	0	0	0	0.0980527	0.07782	0.0265016	0	0.0183874	0	0.0117036	0.0532289	0	0	0.0168117	0	0.302506	0.930617
	23-27S2-27	HS	3.86221	1.49106	168.646	0.00884139	94.3291	2739.7	89.0825	3269.02	27585.7	91375.9	445.691	0	0.0164053	0.00528759	0.0825943	0	0	0.132066	0.00806608	0.0140911	0	0	0.0194582	0.0846924	0.000775341	0.0367091	0.363437
	23-27S2-29	MS	10.6817	7.63035	395.974	0.0192698	530.043	2402.56	165.646	4634.66	28659.5	65610.1	1601.68	0.0291852	0.0162366	0	0	0.0833653	0.0240735	0.00396956	0.0154722	0.0634775	0.0211996	0.0228904	0.00891015	0.167461	0.0160122	0.376514	0.472253	4.04574
	23-27S2-30	HS	43.7375	31.4378	1909	0.0164682	141.163	3213.09	107.02	3800.9	31112.7	102500	582.261	0.0172181	0.0152433	0.0151427	0	0	0.0673353	0.123134	0	0.0183805	0	0.00933487	0	0	0.0019291	0.199285	0.267717		0.231456
	23-27S2-32	HS	5.8123	3.49062	262.142	0.0133158	82.1476	2318.26	95.8819	3072.62	31711.5	102990	384.527	0.0159956	0.00837448	0	0	0	0	0	0	0.0353474	0	0	0.0137752	0.118408	0.0335814	0.0311562	0.225482
	23-27S2-33	HS	2.97419	1.40719	134.034	0.0104988	69.1786	2843.85	91.6672	3525.88	31523.9	97905	278.526	0.01219	0	0	0	0.138459	0.0304078	0	0.00705074	0	0.00122765	0.0522091	0	0.0872874	0	0.079642	0.328832	0.982905
	23-27S2-34	HS	2.15846	0.737187	95.0735	0.00775387	67.1452	1344.98	81.0726	2813.52	28076.7	93899.7	311.614	0	0.0193562	0.00784755	0	0.134022	0	0.143412	0	0.0891391	0.010688	0.0185917	0.0110121	0.0249684	0.00341125	0	0.462448	1
	23-27S2-35	HS	3.15367	1.49878	139.442	0.0107484	74.1454	3095.32	95.8806	3656.65	32231.1	102372	316.386	0.0270354	0	0	0.00229601	0.0791063	0	0	0.028903	0	0	0	0	0.00587426	0.0262074	0.0302878	0.169422
	23-27S2-36	HS	3.18399	1.60383	141.307	0.01135	97.9203	2863.46	99.8325	2574.69	29359.8	97516.7	432.607	0.011997	0.0369898	0	0	0	0	0	0.00744898	0.0332413	0	0.0422698	0.00617935	0	0.000424103	0.0618773	0.13855
	Note: MS = magmatic stage mineralization age; HS = hydrothermal stage mineralization age

## Sheet: Table S5
	Table S5 LA-ICP-MS U-Th-Pb isotopic dating results for zircons of the pegmatites from the Lianyunshan Complex in northeast Hunan, South China
	Spot No	Isotope Ratios						U-Pb Age/Ma
		207Pb/206Pb	2σ	207Pb/235U	2σ	206Pb/238U	2σ	207Pb/206Pb	2σ	207Pb/235U	2σ	206Pb/238U	2σ
	Zircons from ore-free pegmatite (25-16S1, n = 23)
	25-16S1-2	0.05049	0.00065	0.1444	0.0039	0.02067	0.0003	212	30	136.9	3.4	131.9	1.9
	25-16S1-3	0.05366	0.00075	0.1535	0.0044	0.02069	0.00035	351	31	144.9	3.9	132	2.2
	25-16S1-5	0.05045	0.00062	0.139	0.0033	0.02016	0.00031	211	29	132.1	2.9	128.7	2
	25-16S1-6	0.0637	0.0012	0.1789	0.0065	0.02038	0.00036	722	38	166.9	5.6	130	2.3
	25-16S1-7	0.05049	0.00062	0.1439	0.0032	0.02072	0.00034	213	29	136.4	2.8	132.2	2.1
	25-16S1-11	0.05076	0.00069	0.1416	0.0035	0.02027	0.00037	225	31	134.4	3.1	129.3	2.3
	25-16S1-13	0.0505	0.00061	0.1393	0.003	0.02008	0.00037	219	30	132.4	2.6	128.2	2.4
	25-16S1-14	0.05296	0.00072	0.1492	0.0053	0.02035	0.00046	329	34	142	5	129.8	2.9
	25-16S1-16	0.0599	0.0027	0.173	0.011	0.02082	0.00044	577	94	161	9.3	132.8	2.8
	25-16S1-18	0.0687	0.0021	0.194	0.009	0.02043	0.00038	872	59	179.6	7.6	130.4	2.4
	25-16S1-19	0.05252	0.00073	0.1454	0.0034	0.02006	0.00039	309	34	137.8	3	128	2.5
	25-16S1-21	0.05064	0.00057	0.1442	0.004	0.02062	0.0004	220	26	136.6	3.5	131.6	2.5
	25-16S1-22	0.05112	0.00073	0.1464	0.0045	0.02067	0.00046	241	33	138.6	4	131.9	2.9
	25-16S1-23	0.0632	0.0025	0.1775	0.0096	0.02016	0.0004	679	86	165.4	8.3	128.6	2.5
	25-16S1-24	0.0607	0.003	0.172	0.011	0.02029	0.00052	580	100	160.3	9.8	129.5	3.3
	25-16S1-25	0.05005	0.00059	0.1408	0.0035	0.02025	0.00036	193	27	133.7	3.1	129.2	2.3
	25-16S1-26	0.0546	0.001	0.1563	0.0055	0.02045	0.00039	396	43	147.3	4.8	130.5	2.4
	25-16S1-27	0.05293	0.00067	0.1518	0.0036	0.02059	0.00033	321	28	144.1	3	131.4	2.1
	25-16S1-30	0.05038	0.00067	0.1433	0.0038	0.02048	0.00042	207	31	135.9	3.4	130.7	2.6
	25-16S1-32	0.05682	0.00084	0.1593	0.0038	0.02017	0.0004	485	31	150	3.3	128.7	2.5
	25-16S1-33	0.05401	0.00068	0.1534	0.0041	0.02035	0.00032	372	27	144.8	3.6	129.9	2
	25-16S1-36	0.05414	0.00086	0.1521	0.0031	0.02051	0.00031	370	35	143.7	2.7	130.9	2
	25-16S1-42	0.05084	0.00064	0.1432	0.0037	0.02041	0.0004	229	29	135.8	3.3	130.3	2.6
	Zircons from ore-bearing pegmatite (23-27S2, n = 9)
	23-27S2-01	0.0500173	0.000636279	0.132545	0.00182431	0.0192312	0.000193838	194.525	34.25	126.382	1.63558	122.795	1.22598
	23-27S2-07	0.0486629	0.000635086	0.129638	0.00199135	0.0192964	0.000160836	131.57	29.6275	123.773	1.78994	123.207	1.01718
	23-27S2-08	0.0500127	0.000720061	0.132608	0.00229916	0.0192255	0.0002143	194.525	33.325	126.439	2.0612	122.759	1.35541
	23-27S2-11	0.0490458	0.000662733	0.128417	0.00201339	0.0189673	0.000177545	150.085	36.1075	122.674	1.81171	121.126	1.12323
	23-27S2-14	0.0495418	0.000699973	0.129206	0.00193708	0.0189129	0.000187554	172.305	33.3275	123.384	1.74182	120.782	1.18661
	23-27S2-21	0.0509867	0.000744701	0.13191	0.00212056	0.0187308	0.000203103	238.955	33.3275	125.813	1.90226	119.63	1.28521
	23-27S2-22	0.0500146	0.000648809	0.130702	0.00198741	0.0189066	0.00019582	194.525	34.25	124.728	1.78471	120.742	1.23891
	23-27S2-26	0.0499181	0.000687798	0.130745	0.00207307	0.0189724	0.000216682	190.82	33.325	124.767	1.86157	121.158	1.37081
	23-27S2-27	0.0506812	0.00067223	0.131931	0.00209095	0.0188342	0.000198202	233.4	31.4725	125.831	1.87566	120.284	1.25407

## Sheet: Table S6
	Table S6 LA-ICP-MS trace element (ppm) compositions of the zircon grains from the Lianyunshan complex in northeast Hunan, South China
	Spot No.	P	Ti	Hf	Nb	Ta	Nb/Ta	Pb	Th	U	Th/U	La	Ce	Pr	Nd	Sm	Eu	Gd	Tb	Dy	Ho	Er	Tm	Yb	Lu	Y	ΣREE	LREE	HREE	LREE/HREE	Eu/Eu*	Ce/Ce*	TE1,3	TE3,4	Y/Ho	Zr/Hf
	Zircons from ore–free pegmatite (25-16S1, n = 23)
	25-16S1-2	1338.15	1.29	34881.5	4.88	13.16	0.370821	0.377	9.61	9503.33	0.00101122	0.095	1.19	0.152	0.82	3.41	0.08	37.43	26.69	291.88	76.8	326.5	82.61	910.06	160.83	518.09	1918.55	5.747	1912.8	0.0030045	0.0216484	2.428	1.95697	1.46503	6.74596	10.3974
	25-16S1-3	2625.42	17.81	36564.3	35.61	36.31	0.980722	7.23	25.08	21303.3	0.00117728	2.73	24.21	2.91	14.73	16.74	0.91	74.02	46.11	557.01	152.34	653.17	177.26	2102.58	348.51	0.34	4173.23	62.23	4111	0.0151374	0.0790338	2.10597	1.74636	1.45059	0.00223185	13.5257
	25-16S1-5	2213.24	1.91	34903.9	14.13	26.23	0.538696	0.61	16.84	17766.9	0.00101122	0.411	1.82	0.24	1.41	6.45	0.121	57.9	40.16	481.24	130.74	517.65	129.61	1406.39	219.32	383.07	2993.46	10.452	2983.01	0.00350384	0.0191421	1.42079	1.45529	1.48531	2.93001	16.5324
	25-16S1-6	1781.96	33.74	27814	48.13	39.41	1.22126	17.97	46.59	13960.2	0.00333734	5.92	94.81	9.09	53.08	54.67	0.68	123.23	51.05	426.81	98.3	409.99	107.76	1251.02	227.76	860.09	2914.17	218.25	2695.92	0.0809557	0.0253279	3.16881	1.84145	1.3251	8.74964	12.0271
	25-16S1-7	3062.67	2.38	32654.5	9.12	24.99	0.364946	0.98	32.65	27428.8	0.00119035	0.134	1.26	0.219	1.57	11.7	0.178	104.15	69.4	749.78	173.05	638.74	153.12	1634.45	259.54	0.26	3797.29	15.061	3782.23	0.00398204	0.0155891	1.80335	1.72364	1.50826	0.00150246	13.1697
	25-16S1-11	1196.18	1.86	34839.8	4.53	8.89	0.509561	0.504	13.75	9187	0.00149668	0.085	0.64	0.082	0.458	3.26	0.063	36.97	26.1	288.23	66.39	250.27	61.36	669.18	112.07	2778.28	1515.16	4.588	1510.57	0.00303726	0.0175441	1.87953	1.76162	1.51926	41.8479	8.60088
	25-16S1-13	6290.16	3.48	56828.8	10.71	30.15	0.355224	3.93	52.11	43914.1	0.00118663	3.47	14.63	2.15	13.59	42.18	0.85	264.99	158.57	1583.63	355.56	1293.51	306.96	3244.18	528.28	0.34	7812.55	76.87	7735.68	0.00993707	0.0245796	1.31324	1.42674	1.46542	0.000956238	42.7798
	25-16S1-14	3788.98	12.38	17978.8	14.3	19.36	0.738636	9.66	66.58	25439.4	0.0026172	4.89	27.14	4.38	21.62	28.25	0.317	100.44	57.49	718.71	224.06	1123.45	363.96	5121.82	946.95	0.043	8743.48	86.597	8656.88	0.0100033	0.0181937	1.43781	1.48107	1.39801	0.000191913	13.1569
	25-16S1-16	4635.66	5.51	28393.1	7.56	12.4	0.609677	22.52	54.79	24520.7	0.00223444	1.88	11.36	1.48	7.21	12.38	0.58	91.7	65.43	900.29	279.97	1305.26	393.37	5146.7	888.61	0.48	9106.22	34.89	9071.33	0.00384618	0.0526268	1.66976	1.60485	1.4767	0.00171447	23.3659
	25-16S1-18	5222.9	52.05	22533.9	88.42	80.86	1.09349	37.28	65.75	21580.5	0.00304673	8.53	69.2	9.15	47.24	47.95	3.13	143.9	77.42	968.81	308.03	1489.68	471.44	6441.13	1200.08	0.38	11285.7	185.2	11100.5	0.0166839	0.115198	1.92046	1.57781	1.35917	0.00123365	14.3718
	25-16S1-19	2399.67	1.82	31884	55.07	36.45	1.51084	3.93	52.46	25419.9	0.00206373	3.89	22.61	2.28	10.2	13.93	0.301	91.29	56.79	589.94	140.66	538.55	130.48	1412.14	235.77	0.52	3248.83	53.211	3195.62	0.0166512	0.0258049	1.86141	1.67657	1.45609	0.00369686	17.8965
	25-16S1-21	2643.5	2.72	24216.7	5.23	8.38	0.624105	2.08	39.5	24456.9	0.00161509	1.48	7.07	0.79	4.58	13.12	0.363	110.14	68.94	701.49	160.39	570.77	130.66	1317.33	200.85	0.18	3287.97	27.403	3260.57	0.00840436	0.0291938	1.6031	1.51426	1.48631	0.00112226	10.1296
	25-16S1-22	1520.42	1.54	36782.8	4.55	13.41	0.339299	1.35	9.83	10643.7	0.000923551	0.168	1.09	0.116	0.563	2.98	0.129	37.07	27.49	301.25	82.39	352.06	84.85	902.32	157.45	2103.38	1949.93	5.046	1944.88	0.0025945	0.0375227	1.91438	1.70489	1.45213	25.5296	10.043
	25-16S1-23	1433.27	20.76	37446.7	48	55.02	0.87241	8.4	17.59	7670.58	0.00229318	2.51	24.88	2.95	13.54	14.06	0.369	49.33	27.96	289.34	75.67	319.95	80.04	881.77	155.17	2866.78	1937.54	58.309	1879.23	0.0310281	0.0428353	2.24175	1.8174	1.38297	37.8853	17.9577
	25-16S1-24	1015.56	1.47	22982.5	8.01	9.8	0.817347	0.78	9.72	3909.3	0.00248638	0.3	3.7	0.59	6.12	10.69	0.21	37.28	17.31	188.77	53.89	258.77	84.03	1210.24	264.7	1866.39	2136.6	21.61	2114.99	0.0102175	0.03216	2.15625	1.45709	1.30125	34.6333	16.6348
	25-16S1-25	2644.22	4.15	24678	6.89	7.9	0.872152	0.81	55.08	27161.5	0.00202787	2.09	11.25	1.18	5.16	12.14	0.251	105.98	68.93	754.75	180.9	665.54	152.19	1546.65	230.6	0.43	3737.61	32.071	3705.54	0.00865488	0.0213932	1.7564	1.67042	1.49096	0.002377	17.6397
	25-16S1-26	5001.5	19.48	22147.1	23.22	25.72	0.902799	9.17	60.33	21290.8	0.00283362	5.06	37.34	5.61	34.35	54.56	1.44	203.12	101.74	1157.58	328.29	1455.74	418.03	5378.77	936.61	0.35	10118.2	138.36	9979.88	0.0138639	0.0418189	1.71831	1.49246	1.36368	0.00106613	22.4003
	25-16S1-27	3744.75	4.11	17213.7	6.9	8.87	0.777903	4.84	37.86	16669.8	0.00227118	1.12	8.37	1.13	5.79	9.38	0.36	64.84	45.18	643.11	216.82	1109.06	355.87	4916.87	920.36	0.39	8298.26	26.15	8272.11	0.00316122	0.0446276	1.82416	1.62809	1.43212	0.00179873	13.7584
	25-16S1-30	2045.71	1.6	24577.8	6.11	15.52	0.393686	0.502	45.8	23929	0.001914	0.0167	0.026	0.01	0.584	8.48	0.143	81.81	54.73	571.75	126.04	439.69	96.76	938.85	134.01	0.36	2452.9	9.2597	2443.64	0.00378931	0.0165981	0.493287	0.658974	1.53523	0.00285624	3.92528
	25-16S1-32	2439.61	21.41	87054.6	81.83	79.2	1.03321	14.28	41.8	18991.4	0.002201	4.34	38.74	4.73	19.95	17.11	0.69	37.88	18.29	153.13	34.78	133.3	31.23	374.8	60.93	1098.1	929.9	85.56	844.34	0.101334	0.0828596	2.09637	1.79953	1.38103	31.5727	26.0891
	25-16S1-33	4491.23	12.13	19908.7	19.9	15.47	1.28636	8.96	54.86	22118.2	0.00248031	2.5	19.07	2.43	13.12	22.79	0.72	106	63.49	823.21	260.01	1272.31	394.64	5360.83	969.39	0.13	9310.51	60.63	9249.88	0.00655468	0.0447848	1.89698	1.58081	1.40187	0.000499981	12.7868
	25-16S1-36	2126.89	5.07	31796.4	14.73	26.21	0.561999	5.04	15.96	15568.6	0.00102514	1.4	11.78	1.3	6.66	13.07	0.387	79.27	48.96	508.24	125.41	526.17	133.83	1533.89	271.34	299.28	3261.71	34.597	3227.11	0.0107207	0.0367572	2.14089	1.75941	1.43776	2.38641	15.6691
	25-16S1-42	1695.62	25.02	26465.4	33.22	30.05	1.10549	4.78	31.34	19249.4	0.0016281	1.75	14.69	2.32	7.71	10.4	0.07	43.93	28.75	397.66	130.19	729.94	235.77	3841.95	801.46	4578.53	6246.59	36.94	6209.65	0.00594881	0.0100121	1.78749	1.85219	1.38456	35.1681	21.5011
	Zircons from ore–bearing pegmatite (23-27S2, n = 9)
	23-27S2-1	754.09	0.20284	34289.3	3.88167	8.87077	0.43758	5.99017	118.272	19168.4	0.00617018	0.0411159	0.0579699	0.00563167	0.0981268	1.11858	0.12222	10.7299	8.04165	101.589	20.4324	75.2309	15.8984	206.474	24.2387	1360.07	464.079	1.44365	462.635	0.00312049	0.107853	0.934037	0.915604	1.67992	66.5645	0.0013868
	23-27S2-7	295.267	0.0350656	40125	3.48387	10.2514	0.339843	1.41035	31.1859	7336.43	0.00425083	0.0264319	0.0676414	0.00629498	0.0150175	0.014919	0.0329875	0.0630026	0.0647819	1.01559	0.322558	1.91728	0.687029	13.3315	1.99415	23.3916	19.5592	0.163292	19.3959	0.0084189	3.28946	1.28569	1.68675	1.74199	72.5191	0.00112508
	23-27S2-8	260.714	0.14227	48202.3	1.61606	5.62471	0.287314	1.38102	30.1633	4726.09	0.0063823	0.00515248	0.0684687	0.00225648	0.0189757	0.0206924	0.0335277	0.285652	0.201961	2.50434	0.65282	3.69326	1.1735	22.4204	3.52825	45.4938	34.6092	0.149073	34.4602	0.00432597	1.33322	4.92326	1.77782	1.59685	69.6882	0.000940326
	23-27S2-11	334.098	0.354613	40646.9	2.80988	8.72812	0.321934	1.05365	37.9466	8248.2	0.00460059	0.00297047	0.00385822	0	0.00224214	0.0246068	0.0292754	0.20796	0.175805	2.8106	0.826303	4.65858	1.63328	29.4647	4.24272	56.2043	44.0829	0.062953	44.0199	0.0014301	1.25115	0.759194	1.19353	1.69799	68.0189	0.00113782
	23-27S2-14	281.907	0	47185.1	1.8134	5.37312	0.337495	1.03376	35.9886	5737.08	0.00627297	0.00404513	0.0228495	0.00588469	0.0139321	0.0126417	0.0452634	0.148772	0.0893645	1.54218	0.500091	2.81126	1.07364	22.3133	3.58861	32.339	32.1718	0.104617	32.0672	0.00326242	3.19086	1.14824	1.79153	1.51172	64.6662	0.000977475
	23-27S2-21	298.915	0.133933	40543.4	2.13464	7.58199	0.281541	5.27678	52.03	8299.57	0.006269	0.0229286	0.0119784	0.00223666	0.00748285	0.0255267	0.0623057	0.16572	0.11939	1.7587	0.441239	2.49061	0.908384	16.5341	2.38413	34.0991	24.9348	0.132459	24.8023	0.00534059	2.92864	0.410103	1.0111	1.71365	77.2803	0.00114635
	23-27S2-22	392.108	0	41013.8	2.66489	9.35056	0.284997	1.64079	51.1632	9769.31	0.00523714	0.00493745	0.00286064	0.000539013	0.00315475	0.0258185	0.0384272	0.183833	0.16189	2.45747	0.690449	3.73818	1.22831	21.3261	3.00581	47.9252	32.8678	0.0757376	32.7921	0.00230963	1.70524	0.42993	0.922179	1.71624	69.4117	0.00113001
	23-27S2-26	351.619	0.170758	41594.1	3.01486	8.31653	0.362514	1.49009	39.9727	8194.81	0.00487781	0.0196258	0.135602	0.00846209	0.0324401	0.0326175	0.0539129	0.283353	0.254232	3.82014	1.11571	6.49478	2.33526	41.7553	6.27898	78.693	62.6204	0.282661	62.3377	0.00453434	1.71446	2.57988	1.89537	1.71849	70.5316	0.00115193
	23-27S2-27	399.44	0.130378	51838.3	3.65091	17.87	0.204304	1.74531	66.5479	9578.2	0.00694785	0.00251314	0.00582514	0	0.00673514	0.0366732	0.0486896	0.402853	0.283784	3.84503	1.01832	5.29403	1.67773	28.2563	3.98084	70.6299	44.8594	0.100436	44.7589	0.00224394	1.22465	0.853935	1.24139	1.63258	69.3596	0.000900973

## Sheet: Table S7
Table S7 LA-ICP-MS trace element (ppm) compositions of the zircon grains from the Mufushan complex in the Northeast Hunan, South China		Table S7 Lu-Hf isotopic compositions of zircon from the pegmatite in the Lianyunshan Complex of northeast Hunan, South China
Spot No.		Grain Spot No.	Age(Ma)	176Hf/177Hf	2σ	176Lu/177Hf	2σ	176Yb/177Hf	2σ	(176Hf/177Hf)i	εHf(t)	2σ	TDM1	TDM2	fLu/Hf
Zircons from ore–free pegmatite (20-23S, N = 20)		Ore-bearing pegmatite （25-16S1, n = 8)
20-23S1-1		25-16S1-01	131	0.282542	1.11297e-05	0.00220106	1.01494e-05	0.0696857	0.000229799	0.282691	-5.43607	0.393706	1036.87	1532.35	-0.933703
20-23S1-4		25-16S1-02	132	0.28249	1.10683e-05	0.00134638	3.17628e-06	0.0480404	0.000147236	0.28269	-7.18567	0.391536	1087.1	1644.39	-0.959446
20-23S1-5		25-16S1-03	131	0.282519	1.20256e-05	0.00164128	1.2593e-05	0.0599262	0.000574977	0.282691	-6.21643	0.425396	1054.72	1582.06	-0.950564
20-23S1-7		25-16S1-04	132	0.282507	9.90736e-06	0.000807976	3.59398e-06	0.0256847	0.000130821	0.28269	-6.55398	0.350467	1048.6	1604.51	-0.975663
20-23S1-8		25-16S1-05	129	0.282495	1.74899e-05	0.00702117	7.18875e-05	0.220394	0.00281628	0.282692	-7.55527	0.618691	1272.99	1663.07	-0.788519
20-23S1-9		25-16S1-06	131	0.282501	1.234e-05	0.00117621	1.66827e-06	0.0443556	0.000105923	0.282691	-6.81667	0.436521	1067.22	1620.3	-0.964572
20-23S1-10		25-16S1-07	132	0.282507	1.05191e-05	0.00109076	2.23204e-06	0.0403752	0.000311764	0.28269	-6.58363	0.372107	1056.66	1606.3	-0.967146
20-23S1-11		25-16S1-08	130	0.282522	2.22376e-05	0.00671678	2.13287e-05	0.176356	0.000784753	0.282691	-6.55186	0.78664	1216.08	1600.53	-0.797687
20-23S1-12		Ore-bearing pegmatite （23-27S2, n = 6)
20-23S1-13		23-27S2-01	122.795	0.282463	8.82638e-06	0.000122788	2.87114e-06	0.00463606	0.000112212	0.282463	-8.23016	0.312222	1089.52	1704.14	-0.996302
20-23S1-14		23-27S2-02	123.207	0.282457	8.84699e-06	1.36073e-05	7.3985e-08	0.000418827	1.67419e-06	0.282457	-8.44587	0.312951	1095.48	1718.17	-0.99959
20-23S1-15		23-27S2-03	122.759	0.282453	7.21584e-06	6.01609e-06	6.37312e-08	0.000169444	1.18958e-06	0.282453	-8.57434	0.255251	1099.87	1725.98	-0.999819
20-23S1-16		23-27S2-04	121.126	0.282462	8.50562e-06	3.77761e-05	3.83893e-07	0.00114416	1.33893e-05	0.282462	-8.32252	0.300874	1089.55	1708.78	-0.998862
20-23S1-18		23-27S2-05	119.63	0.282452	8.18311e-06	1.70822e-05	5.43585e-07	0.000536257	2.07574e-05	0.282452	-8.69906	0.289465	1102.32	1731.53	-0.999485
20-23S1-19		23-27S2-06	120.742	0.28245	8.10226e-06	1.61165e-05	2.57996e-07	0.000507287	1.08722e-05	0.28245	-8.73529	0.286606	1104.64	1734.66	-0.999515
20-23S1-20		Note: The crystallization ages of ore-bearing pegmatite (ca. 121 Ma) and ore-free pegmatite (ca. 131 Ma) were used for the age data applied in Lu-Hf parameters calculation
20-23S1-22
20-23S1-25
20-23S1-27
20-23S1-28
Zircons from ore–bearing pegmatite (20-11S, n = 19)
20-11S1-1
20-11S1-2
20-11S1-3
20-11S1-4
20-11S1-5
20-11S1-9
20-11S1-11
20-11S1-14
20-11S1-15
20-11S1-16
20-11S1-18

## Sheet: Table S8
	Table S8 LA-ICP-MS U-Th-Pb isotopic dating results of cassiterites from the ore-free pegmatite in the Lianyunshan of northeast Hunan, South China
	Spot No.	Isotope Ratios						U-Pb Age/Ma
		207Pb/235U	2σ	206Pb/238U	2σ	207Pb/206Pb	2σ	207Pb/235U	2σ	206Pb/238U	2σ	207Pb/206Pb	2σ
	23-27S2-2	0.174	0.048	0.0217	0.0013	0.055	0.016	142	39	138.3	8.4	-400	480
	23-27S2-3	0.11	0.2	0.0223	0.0042	0.19	0.12	-50	160	141	27	-2700	1500
	23-27S2-4	0.69	0.26	0.0245	0.0041	0.28	0.11	430	160	155	26	500	1400
	23-27S2-5	0.69	0.13	0.0255	0.002	0.267	0.062	445	82	163	13	1220	670
	23-27S2-6	1.68	0.24	0.0321	0.0018	0.342	0.034	910	81	204	11	3450	160
	23-27S2-7	0.132	0.062	0.0195	0.0017	0.05	0.028	111	54	125	11	-900	700
	23-27S2-8	0.16	0.1	0.0213	0.0025	0.09	0.055	81	79	136	16	-1500	930
	23-27S2-9	1.93	0.67	0.0347	0.0066	0.36	0.22	530	300	218	41	-4300	6100
	23-27S2-10	0.82	0.14	0.026	0.0026	0.257	0.046	572	79	165	16	2890	350
	23-27S2-12	9.79	0.68	0.1003	0.0052	0.741	0.065	2355	69	614	30	4790	170
	23-27S2-16	2.41	0.4	0.0412	0.0042	0.402	0.062	1000	130	259	26	2800	570
	23-27S2-17	9.23	0.69	0.0972	0.0063	0.75	0.067	2310	72	594	37	4800	190
	23-27S2-18	2.75	0.46	0.0464	0.0052	0.476	0.079	1210	140	290	32	3470	540
	23-27S2-20	2.15	0.32	0.0379	0.0037	0.36	0.17	950	120	239	23	-3500	6200
	23-27S2-21	0.506	0.086	0.0236	0.0017	0.191	0.042	361	57	150	11	1190	520
	23-27S2-24	0.528	0.086	0.0237	0.0016	0.163	0.03	375	58	151	10	1220	520

## Sheet: Table S9
	Table S9 Trace element concentrations (ppm) of cassiterite from the pegmatite in the Lianyunshan Complex of northeast Hunan, South China
	Sample	Al	Ti	V	Cr	Mn	Fe	Co	Ni	Zn	Ga	Zr	Hf	Nb	Ta	Mo	Sc	Sb	Ba	W	Hg	Pb	Th	U	Zr/Hf
	23-27S2- 2	68.3	360.8	-	-	16.2	918	4.97	32.7	1.16	3.81	220	60.35	3300	1848	0.15	10.96	0.178	0.63	527	171	-	-	8.64	3.6454
	23-27S2- 3	50.4	495	-	-	25.4	1155	4.99	31.2	0.51	1.69	220.2	55.8	2673	3520	0.221	4.73	0.164	0.48	9.82	165	-	-	2.084	3.94624
	23-27S2- 4	67.9	2707	15.47	11.39	24.9	1832	4.95	32.2	1.69	1.25	272.9	36.03	2963	4659	-	156.3	0.204	0.58	29.41	111	0.022	-	2.37	7.57424
	23-27S2- 5	70.6	277.4	-	-	11.11	778	4.74	32.44	0.38	4.09	175.9	53.42	2827	2254	0.045	10.64	0.192	0.63	161.6	187	0.059	0.0482	3.581	3.29277
	23-27S2- 6	176	3643	24.98	14.69	1300	5250	5.16	31.6	4.35	1.48	583.7	67.49	13320	14470	0.254	62.7	0.247	0.8	261	222	0.818	0.868	30.2	8.64869
	23-27S2- 7	33.5	4470	22.95	24.86	70.8	4286	4.89	31.3	1.18	1.59	505.3	59.4	7365	12060	0.039	158.9	0.158	0.65	29.73	228	-	-	6.71	8.50673
	23-27S2- 8	74.8	2451	13.67	4.03	55.3	2650	5.04	31	1.7	2.75	542.7	94.2	5556	6037	0.218	58.1	0.218	0.63	15.17	171	-	-	3.46	5.76115
	23-27S2- 9	30	1100	4.14	1.96	38.9	1549	4.86	30.6	0.84	1.34	-	96.9	2080	6640	0.274	55.3	0.195	0.5	2.67	202	0.049	0.068	1.086	-
	23-27S2- 10	48.6	4615	12.53	14.31	45.7	2919	5.07	32	0.81	1.58	521.6	54.2	4687	7290	0.052	32.35	0.14	0.53	52.6	152	0.131	0.149	6.97	9.62362
	23-27S2- 12	48.2	1283	6.26	-	48.1	2327	4.79	32	2.13	2.04	550	107.4	3191	8820	0.195	95.5	0.428	0.87	12.62	175	0.619	0.181	2.113	5.12104
	23-27S2- 16	62.2	2486	12	7.36	65.3	2868	4.96	31.33	1.92	2.42	578.4	89.9	6590	6006	0.364	71.25	0.212	0.64	14.58	157	0.212	0.0048	3.107	6.43382
	23-27S2- 17	69.1	1179	2.51	-	91.5	3630	4.9	32.3	2.97	2.74	684.6	121	4830	13940	0.233	40.8	0.232	0.64	8.97	213	0.545	0.043	2.205	5.65785
	23-27S2- 18	15.6	2217	8.91	4.24	18.7	1750	4.96	32.1	-	1	251	40.6	3760	2880	-	75.3	0.182	0.92	15.45	176	0.214	-	2.96	6.18227
	23-27S2- 20	54.5	3370	16.84	18.82	28.2	1506	4.95	31.49	2.22	1.171	377.4	56.89	2589	4170	0.232	30.76	0.221	0.48	10.89	136	0.104	-	2.023	6.63385
	23-27S2- 21	40.8	1836	5.83	1.75	51.7	3970	4.99	30.92	1.02	1.94	353.6	68.4	6600	9260	0.032	24.21	0.248	0.68	82.3	109	0.061	0.0125	5.76	5.16959
	23-27S2- 24	13.83	2279	10.3	1.96	43.1	3495	4.92	31.3	0.39	1.114	297.7	49.49	9080	4418	-	164.1	0.22	0.62	33.56	197	0.052	0.0173	5.314	6.01536

[truncated: 3 more sheets: Table S10, Table S11, Table S12]
